# Supplementary material for: Astrocytic Mechanisms Explaining Neural-Activity-Induced Shrinkage of Extraneuronal Space
Source: PLOS journal article supplement (doi:10.1371/journal.pcbi.1000272), 2009-01-22
Supplement: S7 (10.1371/journal.pcbi.1000272.s007) [file journal.pcbi.1000272.s007]

## Supporting Text S1: Astrocytic mechanisms explaining neural-activity-induced shrinkage of extraneuronal space

### Parameterization

#### Estimates of empirically supported parameters

##### *Membrane area*

Calculation of the specific conductivity  $g$  of the different ion species with the non-specific conductivities  $G$  empirically given makes it convenient to use a mean value for the membrane area of an astrocyte. By using a mean value for the membrane capacitance  $C_m = 37$  pF [1-3] together with the specific capacitance  $1.0 \mu\text{F}/\text{cm}^2$  [4, 5], we arrive at a mean membrane area of  $3.7 \times 10^{-2} \text{ cm}^2$ .

##### *$g_{\text{Cl}}$ = chloride conductance associated with passive $\text{Cl}^-$ channels*

Averages of passive astrocyte membrane properties reported [6, 7] include values of chloride current  $I_{\text{Cl}}$  (in pA) vs. potential  $V$  (in mV) relative to a holding potential of 0 mV. We use this to calculate the total chloride conductivity  $G_{\text{Cl}}$  (in  $\Omega^{-1}$ ) by setting  $G_{\text{Cl}} = \Delta I_{\text{Cl}} / \Delta V_m$ . We use the value cited above for the average membrane area  $A$ , and obtain

$$(S1) \ g_{\text{Cl}} = \frac{G_{\text{Cl}}}{A} = \frac{G_{\text{Cl}}}{3.7 \times 10^{-2} \text{ cm}^2}.$$

Values of  $G_{\text{Cl}}$  and calculated values of  $g_{\text{Cl}}$  are given in Table S1.

##### *$g_{\text{Na}}$ = sodium conductance associated with passive $\text{Na}^+$ channels*

Averages of passive membrane properties reported [1, 8] include values of astrocyte membrane capacitance  $C_m$  from 24.2 to 52.1 pF with an average value of 37 pF. Measured values of  $G_{\text{Na}} / C_m$  ( $G_{\text{Na}}$  is defined as  $G_{\text{Cl}}$  above) and calculated values for  $g_{\text{Na}}$  are listed in Table S2.

$g_{NBC}$  = conductance of the NBC cotransporter

Munsch and Deitmer [9] measured  $\text{Na}^+$  and  $\text{HCO}_3^-$  dependent membrane currents in leech glial cells. From the curve they obtained from measured membrane current  $I_m$  as a function of membrane potential  $V_m$ , the conductance is estimated as

$$(S2) G_{NBC} = \frac{\Delta I_m}{\Delta V_m} \approx \frac{70 \text{ nA}}{25 \text{ mV}} = 2.8 \times 10^{-6} \Omega^{-1}.$$

We use as before a membrane area of  $3.7 \times 10^{-2} \text{ cm}^2$ . This yields the specific NBC conductance

$$(S3) g_{NBC} = \frac{G_{NBC}}{A} \approx \frac{2.8 \times 10^{-6} \Omega^{-1}}{3.7 \times 10^{-2} \text{ cm}^2} = 7.6 \times 10^{-5} \Omega^{-1} \text{ cm}^{-2}.$$

$L_p$  = specific water permeability through passive water channels

The literature gives a lower and an upper estimate for  $L_p$ , defined through eq. (12) in the main text. In order to compare with literature estimates, we need first to translate given values of number flux permeability  $P_f$  (given in cm/s) into corresponding values of  $L_p$  (defined through volume flux). Since number flux  $j$  = number of molecules/(area · time) is related to  $P_f$  through the equation

$$(S4) j = P_f \Delta c,$$

where  $j$  is the number flux and  $\Delta c$  is the concentration gradient giving rise to  $j$ , while eq. (12) in the main paper states the following expression for volume flux  $J$  or volume/time measured in  $\text{cm}^3/\text{s}$  (membrane area  $A$  is inserted here to yield total flux through area  $A$ ):

$$(S5) J = L_p A \Delta \Pi,$$

the total volume of water passing through the membrane per unit time measured in  $\text{cm}^3/\text{s}$  can be expressed by:

$$(S6) J = \frac{\text{total volume}}{\text{time}} = P_f A \Delta c \times \frac{\text{volume}}{\text{molecule}} = L_p A \Delta \Pi.$$

This means that with  $P_f$  given, we may calculate  $L_p$  by means of the relation

$$(S7) L_p = \frac{P_f \Delta c \frac{\text{volume}}{\text{molecule}}}{\Delta \Pi} = P_f \times \frac{\text{number of molecules}}{\text{mmol}} \times \frac{\text{volume}}{\text{molecule}},$$

since  $\Delta c$  is given as (number of molecules)/volume and  $\Delta \Pi$  is given in units of mmol/volume. Hence, we have by eq. (S7)

$$(S8) L_p = P_f \times 6 \times 10^{20} \text{ mmol}^{-1} \times 1.0 \frac{1}{\text{kg}} \times 18 \times 1.66 \times 10^{-27} \text{ kg} = \frac{P_f}{5.6 \times 10^4 \text{ mmol/l}}.$$

According to Gunnarson et al.[10], AQP4 channels in astrocytes have a  $P_f$  value of about  $1.2 \times 10^{-3}$  cm/s. By eq. (S8), this means a value of  $L_p$  of  $2.1 \times 10^{-8}$  (cm/s)(mM) $^{-1}$ . A somewhat different estimate is given by Yang and Verkman [11]. Single channel water permeability for AQP4 is given as  $(24 \pm 0.6) \times 10^{-14}$  cm $^3$ /s. With a density of AQP4 channels in mammalian astrocytes estimated as about 100 per  $\mu\text{m}^2$  (unpublished), we arrive at the estimate

$$(S9) L_p = \frac{(24 \times 10^{-14} \text{ cm}^3/\text{s}) \times 100 \mu\text{m}^{-2}}{5.6 \times 10^4 \text{ mmol/l}} = 4.3 \times 10^{-8} \text{ cm s}^{-1} \text{ mM}^{-1}.$$

### *Potassium efflux and sodium influx*

We seek expressions for the rate  $k_C$  of  $\text{Na}^+$  and  $\text{K}^+$  ions drawn into and expelled from the neuron, respectively, during transition from baseline to excited state. Both can be expressed in terms of the baseline ECS volume to astrocyte surface area ratio  $w_o^0$  and intra- and extracellular ion concentrations.

We assume that the number of  $\text{Na}^+$  ions taken up by and the number of  $\text{K}^+$  ions that are expelled from the neuron are identical and equal to  $k_C$  (see below for a justification of this). This ensures that the total ECS and astrocyte charge is conserved. Further, we set the initial (baseline) astrocyte volume to ECS volume ratio  $w_i/w_o$  equal to  $p$  and assume that relative ECS volume shrinkage in the excited state is 30 %, implying that  $w_o^1 \approx 0.7 w_o^0$  and  $w_i^1 \approx (p + 0.3) w_o^0$ . Thus, in the baseline (BL) and excited (EX) states, respectively, we have

$$(S10) \begin{aligned} N_{\text{K}^+, \text{tot}, \text{BL}} &= [\text{K}^+]_o^0 w_o^0 + [\text{K}^+]_i^0 w_i^0 \approx w_o^0 ([\text{K}^+]_o^0 + p [\text{K}^+]_i^0), \\ N_{\text{K}^+, \text{tot}, \text{EX}} &= [\text{K}^+]_o^1 w_o^1 + [\text{K}^+]_i^1 w_i^1 \approx w_o^0 (0.7 [\text{K}^+]_o^1 + (p + 0.3) [\text{K}^+]_i^1). \end{aligned}$$

Using  $[\text{K}^+]_o^0 = 3$  mM,  $[\text{K}^+]_i^0 = 100$  mM,  $[\text{K}^+]_o^1 = 7$  mM,  $[\text{K}^+]_i^1 = 110$  mM (where superscripts 0 and 1 refer to baseline and excited states, respectively), and subtracting the two we obtain

$$(S11) N_{\text{K}^+, \text{tot}, \text{EX}} - N_{\text{K}^+, \text{tot}, \text{BL}} \approx w_o^0 \times (1 + 0.29 p) \times 34.9 \text{ mM},$$

which is the expelled  $\text{K}^+$  per membrane area to the ECS from the neuron.

In addition to the quantity  $w_o^0 \times (1 + 0.29 p) \times 34.9$  mM, the flux rate per unit area  $k_C$  to be determined depends on the duration  $\Delta t$  of enhanced neural activity. The total amount of potassium (per unit area) expelled from the neuron during the time interval is equal to  $k_C \Delta t$ . Consequently, using  $w_o^0 = w_i^0 / p$ ,  $w_i^0 = 1/20 \mu\text{m}$ ,  $\Delta t = 20$  s and  $p = 2$ ,

$$(S12) k_c \approx \frac{w_o^0(1+0.29p) \times 34.9 \text{ mM}}{\Delta t} = \frac{w_i^0}{\Delta t} \left( \frac{1}{p} + 0.29 \right) \times 34.9 \text{ mM} \approx 0.069 \mu\text{m mM s}^{-1}.$$

In the model, we assume that the instantaneous potassium efflux (and sodium influx) is  $k_c f(t)$  (or  $-k_c f(t)$  in the sodium case), where the function  $f(t)$  has unity integral and is found by requiring that  $[K^+]_o$  has the temporal shape of a beta-distribution;

$$P(x) = \frac{(1-x)^{\beta-1} x^{\alpha-1}}{B(\alpha, \beta)},$$

where  $B(\alpha, \beta)$  is the normalization constant that ensures  $\int_0^1 P(x) dx = 1$ . In our simulations

we set  $\alpha = 2$  and estimate  $\beta$  according to some preset conditions (see Methods in main paper).

#### *Justification of setting the $Na^+$ influx rate equal to $K^+$ efflux rate*

By repeating the above for sodium, using  $[Na^+]_o^0 = 140 \text{ mM}$ ,  $[Na^+]_i^0 = 15 \text{ mM}$ ,  $[Na^+]_o^1 = 133 \text{ mM}$ ,  $[Na^+]_i^1 = 10 \text{ mM}$  (where, again, superscripts 0 and 1 refer to baseline and excited states, respectively), the ratio  $K^+$  efflux rate to  $Na^+$  influx rate is

$$\frac{K^+ \text{ efflux rate}}{Na^+ \text{ influx rate}} \approx 0.795 \frac{1+0.29p}{1+0.11p},$$

which lies in the range (0.92, 1.10) for  $1 \leq p \leq 3$ , for  $p = 2$  the ratio is 1.03 and the ratio is equal to 1 for  $p = 1.70$ . This demonstrates that the assumption that potassium and sodium fluxes are equal in magnitude is not contradicted by empirical data.

#### *Other parameters*

We also mention the flux parameters of NKCC1 and KCC1,  $g_{NKCC1}$  and  $g_{KCC1}$ , the astrocyte area to ECS volume  $v_o/A$ , the ECS to astrocyte volume  $v_o/v_i$  and the sodium-potassium pump parameters  $K_{Na i}$  and  $K_{K o}$  (values of these parameters and associated references are listed in Table S8).

#### **Estimation of initial ion concentrations**

In order to solve the model equations some baseline ion concentrations were set (according to empirical data, see Table S3) and others were estimated. In the latter category,  $[Cl^-]_o$  and  $[Cl^-]_i$  were estimated using the ECS electroneutrality condition and the assumption that in the baseline state  $E_{Cl}$  is equal to the membrane potential, respectively (assuming that

KCC1 and/or NKCC1 are constitutive the latter estimation had to be altered). Further,  $[\text{HCO}_3^-]_i$  was estimated assuming that  $E_{\text{NBC}}$  is equal to the baseline membrane potential.

#### *Number of intracellular impermeable molecules $X_i$*

The number per unit area of impermeable molecules  $X_i$  (within the astrocyte) was estimated using osmotic equilibrium at baseline steady state;

$$X_i = w_i^0 ([\text{Na}^+]_o - [\text{Na}^+]_i + [\text{K}^+]_o - [\text{K}^+]_i + [\text{Cl}^-]_o - [\text{Cl}^-]_i + [\text{HCO}_3^-]_o - [\text{HCO}_3^-]_i).$$

This estimate would have been different if  $X_i$  had been calculated based on intracellular electroneutrality. This apparent contradiction is resolved by presuming that intracellular impermeable molecules have an average charge  $z_i$  that is estimated using the first of eq. (1) in the main paper under baseline conditions. The quantity  $z_i$  does not affect the behaviour of the model equations, since the membrane potential at any instant is found by using the electroneutrality condition

$$(S13) \quad \frac{dN_{i,\text{Na}^+}}{dt} + \frac{dN_{i,\text{K}^+}}{dt} = \frac{dN_{i,\text{Cl}^-}}{dt} + \frac{dN_{i,\text{HCO}_3^-}}{dt}$$

and substitute the expressions from eqs. (3) in the main paper.

#### *Potassium conductance and $J_{\text{NaKATPase,max}}$*

The values of the maximum Na/K/ATPase pump rate  $J_{\text{NaKATPase,max}}$  and  $g_K$  were estimated as solutions of the baseline steady state equations (obtained by setting the derivatives in Eqs. (3) in the main paper equal to zero and using baseline values of ion concentrations and membrane potential),

$$(S14) \quad \begin{aligned} -\frac{g_{\text{Na}}}{F} [V_m - E_{\text{Na}}] - 3J_{\text{NaKATPase}} &= 0, \\ -\frac{g_K}{F} [V_m - E_K] + 2J_{\text{NaKATPase}} &= 0. \end{aligned}$$

Note that the rate  $J_{\text{NaKATPase,max}}$  is obtained directly from the first of eqs. (S14), and that  $g_K$  then follows directly from the second of eqs. (S14). The values for the parameters not mentioned here were set (according to the values given in Table S8).

## Supporting tables

**Table S1 Measured values of  $G_{Cl}$  and corresponding calculated values of  $g_{Cl}$ .**

| Reference                | $G_{Cl}$ ( $\Omega^{-1}$ ) | $g_{Cl}$ ( $\Omega^{-1}\text{cm}^{-2}$ ) |
|--------------------------|----------------------------|------------------------------------------|
| Makara et al., 2003 [7]  | $2.0 \times 10^{-9}$       | $5.4 \times 10^{-5}$                     |
| Ferroni et al., 1997 [6] | $2.7 \times 10^{-8}$       | $7.3 \times 10^{-4}$                     |

**Table S2 Measured values of  $C_m$ ,  $G_{Na} / C_m$  and corresponding calculated values of  $g_{Na}$ .**

| Reference                       | Species                         | $C_m$ (pF) | $G_{Na} / C_m$ (pS/pF) | $g_{Na}$ ( $\Omega^{-1}\text{cm}^{-2}$ ) |
|---------------------------------|---------------------------------|------------|------------------------|------------------------------------------|
| Bordey and Sontheimer, 2000 [2] | Rats, hippocampus dentate gyrus | 24.2       | 462                    | $4.9 \times 10^{-4}$                     |
| Bordey and Sontheimer, 2000 [2] | Rats, cortex                    | 34.3       | 301.3                  | $3.0 \times 10^{-4}$                     |
| Bordey et al., 2000 [3]         | Rats, cortical layer I          | 41.4       | 99.6                   | $1.0 \times 10^{-4}$                     |
| Bordey and Sontheimer, 1998 [1] | Human, hippocampus/cortex       | 52.1       | 32.3                   | $3.2 \times 10^{-5}$                     |
| Bordey and Sontheimer, 1998 [1] | Rats, hippocampus               | 32.0       | 88.7                   | $8.9 \times 10^{-5}$                     |

**Table S3 Baseline ion concentrations with references.**

|               | Concentration (mM) | Reference(s)                                                                                                                   |
|---------------|--------------------|--------------------------------------------------------------------------------------------------------------------------------|
| $[K^+]_o$     | 3                  | Dietzel et al.1982[12]; Walz and Hertz 1983[13]; Dietzel and Heinemann 1986[14]; Lux et al. 1986[15]; Rose and Ransom 1996[16] |
| $[Na^+]_o$    | 146                | Dietzel and Heinemann 1986[14]; Dietzel et al.1982[12]                                                                         |
| $[HCO_3^-]_o$ | 15                 | Tong and Chesler 2000[17]; Boussouf et al. 1997[18]; Sohma et al. 2000[19]                                                     |
| $[K^+]_i$     | 100                | Walz and Hertz 1983[13]; Stys et al. 1997[20]                                                                                  |
| $[Na^+]_i$    | 15                 | Rose and Ransom 1996[16]                                                                                                       |

**Table S4 Consistency rates and relative volume shrinkage.** Consistency rates (CR) and relative volume shrinkage (RS) in the excited state given by model configurations mc2, mc4 and mc5 under the two different constraints situations (ion concentrations only (EC1) and ion concentrations plus ECS shrinkage in the 25-35 % range (EC2)). Here, data are obtained assuming that KCC1 and NKCC1 are constitutive.

| EC1 |                     |                     | EC2                 |                     |
|-----|---------------------|---------------------|---------------------|---------------------|
|     | CR <sub>1</sub> (%) | RS <sub>1</sub> (%) | CR <sub>2</sub> (%) | RS <sub>2</sub> (%) |
| H2  | 5.2                 | 10.8±4.5            | 0.008               | 25.3±0.2            |
| H4  | 15.1                | 13.1±4.7            | 0.16                | 26.6±1.4            |
| H5  | 36.4                | 18.7±6.6            | 6.1                 | 28.6±2.6            |

**Table S5 Ion concentrations in the excited state.** Ion concentrations in the excited state (given as mean  $\pm$  sd, mean  $\pm$  sd of baseline ion concentrations are provided in parentheses for comparison) for the parameter sets that satisfy the ion concentration constraints plus ECS shrinkage in the 25-35 % range in the model configurations mc3 - mc5.

|                                                    | H3                             | H4                             | H5                             |
|----------------------------------------------------|--------------------------------|--------------------------------|--------------------------------|
| [K <sup>+</sup> ] <sub>o</sub> (mM)                | 9.4 $\pm$ 0.5 (2.9 $\pm$ 0.1)  | 9.2 $\pm$ 0.6 (2.9 $\pm$ 0.1)  | 8.6 $\pm$ 0.9 (3.0 $\pm$ 0.2)  |
| [K <sup>+</sup> ] <sub>i</sub> (mM)                | 110 $\pm$ 5 (100 $\pm$ 6)      | 110 $\pm$ 5 (100 $\pm$ 6)      | 110 $\pm$ 5 (100 $\pm$ 6)      |
| [Na <sup>+</sup> ] <sub>o</sub> (mM)               | 141 $\pm$ 7 (148 $\pm$ 7)      | 148 $\pm$ 4 (154 $\pm$ 4)      | 143 $\pm$ 7 (149 $\pm$ 7)      |
| [Na <sup>+</sup> ] <sub>i</sub> (mM)               | 8.5 $\pm$ 1.0 (14.9 $\pm$ 0.9) | 8.8 $\pm$ 1.0 (14.9 $\pm$ 0.9) | 9.0 $\pm$ 1.0 (15.0 $\pm$ 0.9) |
| [Cl <sup>-</sup> ] <sub>o</sub> (mM)               | 142 $\pm$ 7 (135 $\pm$ 7)      | 137 $\pm$ 4 (142 $\pm$ 4)      | 142 $\pm$ 7 (136 $\pm$ 7)      |
| [Cl <sup>-</sup> ] <sub>i</sub> (mM)               | 15.2 $\pm$ 1.1 (5.1 $\pm$ 0.3) | 19 $\pm$ 1 (5.3 $\pm$ 0.1)     | 17 $\pm$ 2 (5.1 $\pm$ 0.3)     |
| [HCO <sub>3</sub> <sup>-</sup> ] <sub>o</sub> (mM) | 8.5 $\pm$ 0.6 (15.1 $\pm$ 0.9) | 20 $\pm$ 1 (14.9 $\pm$ 0.8)    | 9.1 $\pm$ 0.8 (15.0 $\pm$ 0.9) |
| [HCO <sub>3</sub> <sup>-</sup> ] <sub>i</sub> (mM) | 11.4 $\pm$ 0.8 (9.2 $\pm$ 0.6) | 8.4 $\pm$ 0.5 (9.2 $\pm$ 0.6)  | 11.3 $\pm$ 0.8 (9.1 $\pm$ 0.6) |

**Table S6 Consistency rates and relative volume shrinkage when there is a neuronal influx of chloride.** Consistency rates (CR) and relative volume shrinkage (RS) in the excited state given by model configurations mc1 to mc5 under the two different constraints situations (ion concentrations only (EC1) and ion concentrations plus ECS shrinkage in the 25-35 % range (EC2)) for the case where a share of the potassium neuronal efflux is replaced by a chloride influx. The case where the potassium efflux is unaltered and a flux of the same magnitude is added to the sodium influx gives very similar results (data not shown).

|    | EC1                 |                     | EC2                 |                     |
|----|---------------------|---------------------|---------------------|---------------------|
|    | CR <sub>1</sub> (%) | RS <sub>1</sub> (%) | CR <sub>2</sub> (%) | RS <sub>2</sub> (%) |
| H1 | 10.9                | 14.8 $\pm$ 5.9      | 0.642               | 27.9 $\pm$ 2.3      |
| H2 | 5.9                 | 14.2 $\pm$ 5.7      | 0.278               | 27.8 $\pm$ 2.1      |
| H3 | 26.2                | 22.1 $\pm$ 9.4      | 5.8                 | 29.2 $\pm$ 2.8      |
| H4 | 11.6                | 17.9 $\pm$ 6.4      | 1.6                 | 28.5 $\pm$ 2.6      |
| H5 | 25.5                | 27.0 $\pm$ 11.0     | 7.3                 | 29.5 $\pm$ 2.9      |



**Table S7 Empirically supported concentration data in baseline and excited states.**

Summary of empirically supported concentration data in baseline and excited states (given as “concentration in baseline/concentration in excited state”) suitable for comparison with model outputs.

| Reference                                      | [K <sup>+</sup> ] <sub>o</sub><br>(mM) | [Na <sup>+</sup> ] <sub>o</sub><br>(mM) | [Cl] <sub>o</sub><br>(mM) | [K <sup>+</sup> ] <sub>i</sub><br>(mM) | [Na <sup>+</sup> ] <sub>i</sub><br>(mM) | [Cl] <sub>i</sub><br>(mM) |
|------------------------------------------------|----------------------------------------|-----------------------------------------|---------------------------|----------------------------------------|-----------------------------------------|---------------------------|
| Dietzel et al., 1982 <sup>a)</sup> [12]        | 3/10                                   | 146/139                                 | 149/156                   | -/-                                    | -/-                                     | -/-                       |
| Walz and Hertz, 1983 <sup>b)</sup> [13]        | 3/12                                   | -/-                                     | -/-                       | 80/118                                 | 28/22                                   | 23/28                     |
| Dietzel and Heinemann, 1986 <sup>c)</sup> [14] | 3/7                                    | 146/142                                 | 148/152                   | -/-                                    | -/-                                     | -/-                       |
| Lux et al., 1986 <sup>d)</sup> [15]            | 3/9                                    | 149/142                                 | 144/150                   | -/-                                    | -/-                                     | -/-                       |
| Rose and Ransom, 1996 <sup>e)</sup> [16]       | 3/4, 8                                 | -/-                                     | -/-                       | -/-                                    | 14.6/12.1,<br>9.5                       | -/-                       |
| Bekar and Walz, 2002 <sup>f)</sup> [21]        | -/-                                    | -/-                                     | -/-                       | -/-                                    | -/-                                     | 29/-                      |
| Stys et al., 1997 <sup>g)</sup> [20]           | -/-                                    | -/-                                     | -/-                       | 122/-                                  | 39/-                                    | 25/-                      |

a) In vivo stimulation through Ag/AgCl balls on cortical surface or by electrical stimuli, recording micro-electrodes in the sensi-motor cortex of cats. b) Radiotracers in primary cultures of astrocytes, result of increase of [K<sup>+</sup>]<sub>o</sub>. c) In vivo measurements on cat brain, ex vivo measurements on rat hippocampal slices, physiological, electrical and chemical stimuli. d) In vivo experiments on cats, cortex, thalamus, spinal cord, dorsal-column nuclei, hippo-campus, electrical stimulation. e) In vitro measurements on astrocytes in standard saline, emission fluorescence measurements of intracellular Na<sup>+</sup>. f) Cell culture of hippocampal astrocytes from rats in perfusion chamber, measurement of effect of GABA<sub>A</sub> agonist muscimol on K<sup>+</sup> current. g) Interface brain slice chamber with dissected optic nerves from rats, electron probe X-ray measurements of water content and concentrations.

**Table S8 Parameters of the model with values.** Parameters of type “empirical” have been retrieved directly from the literature, while the “estimated” parameters have been calculated using data found in the literature.

| Parameter                   | Value                                                          | Type                | Explanation and reference                                                                   |
|-----------------------------|----------------------------------------------------------------|---------------------|---------------------------------------------------------------------------------------------|
| $R$                         | $8.315 \text{ J mol}^{-1} \text{ K}^{-1}$                      | Physical constant   | Universal gas constant                                                                      |
| $F$                         | $9.649 \times 10^4 \text{ C mol}^{-1}$                         | Physical constant   | Faraday’s constant                                                                          |
| $T$                         | 300 K                                                          | Physical constant   | Temperature                                                                                 |
| $e$                         | $1.6 \times 10^{-19} \text{ C}$                                | Physical constant   | Elementary charge                                                                           |
| $g_{\text{Na}}$             | $1 \times 10^{-4} \Omega^{-1} \text{ cm}^{-2}$                 | Empirical/estimated | Sodium conductivity per membrane area                                                       |
| $g_{\text{Cl}}$             | $1 \times 10^{-4} \Omega^{-1} \text{ cm}^{-2}$                 | Empirical/estimated | Chloride conductivity per membrane area                                                     |
| $w_i = v_i / A^{\text{a)}}$ | $1/20 \mu\text{m}$                                             | Empirical           | Baseline ratio of astrocyte volume to area [22]                                             |
| $v_o / v_i^{\text{b)}}$     | 0.5                                                            | Empirical           | Baseline ratio of ECS volume to astrocyte volume [23]                                       |
| $L_p$                       | $2 \times 10^{-8} \text{ cm s}^{-1} (\text{mM})^{-1}$          | Empirical/estimated | Permeability of the astrocyte membrane                                                      |
| $g_{\text{NKCC1}}$          | $2 \times 10^{-6} \Omega^{-1} \text{ cm}^{-2}$                 | Empirical           | Flux parameter of NKCC1 cotransporter [24]                                                  |
| $g_{\text{KCC1}}$           | $7 \times 10^{-5} \Omega^{-1} \text{ cm}^{-2}$                 | Empirical           | Flux parameter of KCC1 cotransporter [24]                                                   |
| $g_{\text{NBC}}$            | $8 \times 10^{-5} \Omega^{-1} \text{ cm}^{-2}$                 | Empirical/estimated | Flux parameter of NBC cotransporter ( $\Omega^{-1} \text{ cm}^{-2}$ )                       |
| $k_C$                       | $\approx 0.069 \mu\text{m mM s}^{-1}$<br>(see earlier section) | Empirical/estimated | Quantity describing the rate of neuronal efflux of $\text{K}^+$ and influx of $\text{Na}^+$ |
| $K_{\text{Nai}}$            | 10 mM                                                          | Empirical           | Threshold value for $[\text{Na}^+]_i$ in Na/K/ATPase model [25]                             |
| $K_{\text{Ko}}$             | 1.5 mM                                                         | Empirical           | Threshold value for $[\text{K}^+]_o$ in Na/K/ATPase model [25]                              |

- a) Data from rat dentate gyrus ( $18.9 - 33.0 \mu\text{m}^{-1}$ , mean  $26.2 \mu\text{m}^{-1}$  [22]), Bergmann glia (cerebellum) ( $13 - 15 \mu\text{m}^{-1}$  [26]) and rats, gliotic cortex, reactive astrocytes ( $5.37 \pm 0.62 \mu\text{m}^{-1}$  [27]). b) Estimates: 0.44 based on ECS volume fraction = 20% and glial volume fraction = 45 % [23, 28], 0.25 based on  $V_i = 3.8 \times 10^{-8} \text{ cm}^3$ ,  $V_o = 9.50 \times 10^{-9} \text{ cm}^3$  [5] and 0.67 [24].

## References

1. Bordey A, Sontheimer H. (1998) Properties of human glial cells associated with epileptic seizure foci. *Epilepsy Res* 32: 286-303.
2. Bordey A, Sontheimer H. (2000) Ion channel expression by astrocytes in situ: comparison of different CNS regions. *Glia* 30: 27-38.
3. Bordey A, Lyons SA, Hablitz JJ, Sontheimer H. (2000) Electrophysiological characteristics of reactive astrocytes in experimental cortical dysplasia. *J Neurophysiol* 85(4): 1719-1731.
4. Nelson P. (2004) *Biological Physics*. New York: Freeman & Company.
5. Yi CS, Fogelson AL, Keener JP, Peskin CS. (2003) A mathematical study of volume shifts and ionic concentration changes during ischemia and hypoxia. *J.Theor.Biol.* 220(1): 83-106.
6. Ferroni S, Marchini C, Nobile M, Rapisarda C. (1997) Characterization of an inwardly rectifying chloride conductance expressed by cultured rat cortical astrocytes. *Glia* 21: 217-227.
7. Makara JK, Rappert A, Matthias K, Steinhäuser C, et al. (2003) Astrocytes from mouse brain slices express C1C-2-mediated  $\text{Cl}^-$  currents regulated during development and after injury. *Mol Cell Neurosci* 23: 521-530.
8. Bordey A, Sontheimer H. (2000) Ion channel expression by astrocytes in situ: comparison of different CNS regions. *Glia* 30(1): 27-38.
9. Munsch T, Deitmer JW. (1994) Sodium-bicarbonate cotransport current in identified leech glial cells. *J Physiol* 474(1): 43-53.
10. Gunnarson E, Axehult G, Baturina G, Zelenin S, et al. (2005) Lead induces increased water permeability in astrocytes expressing aquaporin 4. *Neuroscience* 136: 105-114.

11. Yang B,Verkman AS. (1997) Water and glycerol permeabilities of aquaporins 1-5 and MIP determined quantitatively by expression of epitope-tagged constructs in *Xenopus* oocytes. *J Biol Chem* 272(26): 16140-16146.
12. Dietzel I, Heinemann U, Hofmeier G, Lux HD. (1982) Stimulus-induced changes in extracellular Na<sup>+</sup> and Cl<sup>-</sup> concentration in relation to changes in the size of the extracellular space. *Exp Brain Res* 46(1): 73-84.
13. Walz W, Hertz L. (1983) Intracellular ion changes of astrocytes in response to extracellular potassium. *J Neurosci Res* 10(4): 411-423.
14. Dietzel I,Heinemann U. (1986) Dynamic variations of the brain cell microenvironment in relation to neuronal hyperactivity. *Ann NY Acad Sci* 481: 72-86.
15. Lux HD, Heinemann U, Dietzel I. (1986) Ionic changes and alterations in the size of the extracellular space during epileptic activity. *Adv Neurol* 44: 619-639.
16. Rose CR, Ransom BR. (1996) Intracellular sodium homeostasis in rat hippocampal astrocytes. *J Physiol (Lond)* 491(2): 291-305.
17. Tong CK, Chesler M. (2000) Modulation of spreading depression by changes in extracellular pH. *J Neurophysiol* 84(5): 2449-2457.
18. Boussouf A, Lambert RC. (1997) Voltage-dependent Na<sup>+</sup>-HCO<sub>3</sub><sup>-</sup> cotransporter and Na<sup>+</sup>/H<sup>+</sup> exchanger are involved in intracellular pH regulation of cultured mature rat cerebellar oligodendrocytes. *Glia* 19: 74-84.
19. Sohma Y, Gray MA, Imai Y, Argent BE. (2000) HCO<sub>3</sub><sup>-</sup> transport in a mathematical model of the pancreatic ductal epithelium. *J Membrane Biol* 176: 77-100.
20. Stys PK, Lehning E, Saubermann AJ, LoPachin Jr. RM. (1997) Intracellular concentrations of major ions in rat myelinated axons and glia: Calculations based on electron probe X-ray microanalyses. *J Neurochem* 68(5): 1920-1928.
21. Bekar LK,Walz W. (2002) Intracellular chloride modulates A-type potassium currents in astrocytes. *Glia* 39: 207-216.
22. Hama K, Arii T. (2004) Tri-dimensional morphometric analysis of astrocytic processes with high voltage electron microscopy of thick Golgi preparations. *J Neurocyt* 33: 277-285.
23. Anderson AW, Xie J, Pizzonia J, Bronen RA, et al. (2000) Effects of cell volume fraction changes on apparent diffusion in human cells. *Magn Reson Imaging* 18: 689-695.

24. Dronne MA, Boissel JP, Grenier E. (2006) A mathematical model of ion movements in grey matter during a stroke. *J Theor Biol* 240(4): 599-615.
25. Luo CH, Rudy Y. (1994) A dynamic model of the cardiac ventricular action potential. I. Simulations of ionic currents and concentration changes. *Circ Res* 74(6): 1071-1096.
26. Grosche J, Matyash V, Möller T, Verkhratsky A, et al. (1999) Microdomains for neuron-glia interaction: parallel fiber signaling to Bergmann glial cells. *Nat Neurosci* 2(2): 139-143.
27. Anderova M, Antonova T, Petrik D, Neprasova H, et al. (2004) Voltage-dependent potassium currents in hypertrophied rat astrocytes after a cortical stab wound. *Glia* 48(4): 311-326.
28. Syková E, Vargová L, Prokopová S, Simonová Z. (1999) Glial swelling and astrogliosis produce diffusion barriers in the rat spinal cord. *Glia* 25: 56-70.
